# Supplementary material for: Photocatalysis: A Possible Vital Contributor to the Evolution of the Prebiotic Atmosphere and the Warming of the Early Earth
Source: MDPI journal article supplement (doi:10.3390/catal13091310), 2023-09-20
Supplement: s1 [file s1]

---

*Supplementary Materials*

# **Photocatalysis: A Possible Vital Contributor to the Evolution of the Prebiotic Atmosphere and the Warming of the Early Earth**

**Chuchu Cheng <sup>†</sup>, Fangjie Xu <sup>†</sup>, Wenwen Shi, Qiaoyun Wang and Caijin Huang <sup>\*</sup>**

State Key Laboratory of Photocatalysis on Energy and Environment, College of Chemistry, Fuzhou University, Fuzhou 350116, China; cccheng@dicp.ac.cn (C.C.); 211320199@fzu.edu.cn (F.X.); 211320204@fzu.edu.cn (W.S.); 221310057@fzu.edu.cn (Q.W.)

<sup>\*</sup> Correspondence: cjhuang@fzu.edu.cn

<sup>†</sup> These authors contributed equally to this work.

## Figures

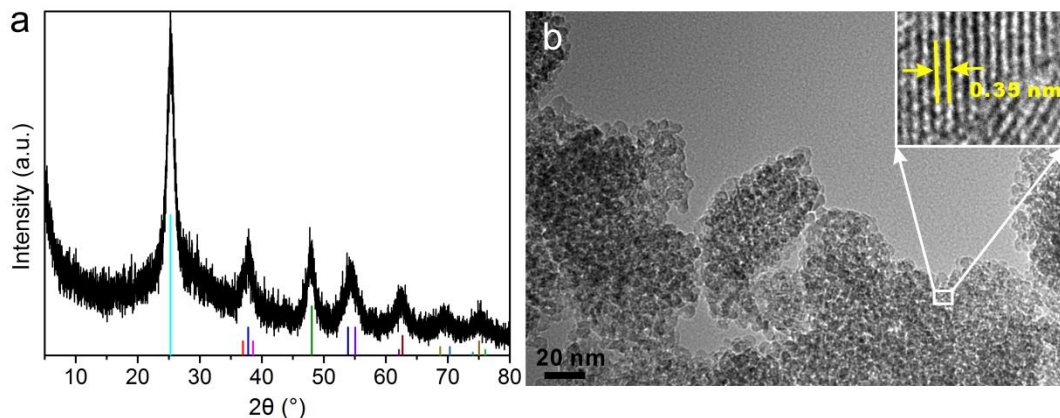

**Figure S1.** (a) XRD pattern of TiO<sub>2</sub> and JCPDS standard card (21-1272) [1]; (b) TEM image of TiO<sub>2</sub>. (Inset shows the HRTEM of TiO<sub>2</sub>, where lattice fringes with a spacing of 0.35 nm correspond to the (101) plane of TiO<sub>2</sub> [2].)

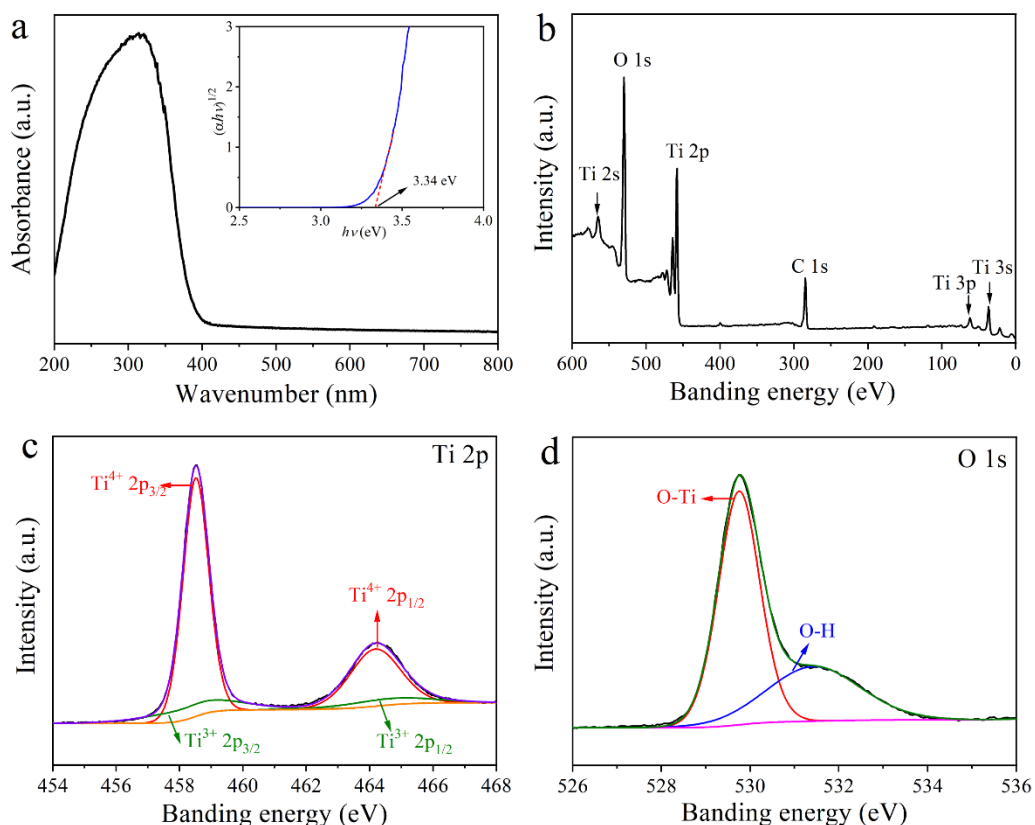

**Figure S2.** (a) UV-Vis diffusion reflectance spectrum (DRS) of TiO<sub>2</sub>. (Inset: a value of 3.34 eV was observed read for the band gap of TiO<sub>2</sub> between the  $(F(R)h\nu)^{1/2}$  and E plots.); (b) XPS survey of commercial TiO<sub>2</sub> [3]; (c) Ti 2p lines and fit. The peak at 458.6 eV fits to Ti<sup>4+</sup>, which is attributed to Ti-O in the TiO<sub>2</sub> [4]; (d) O 1s lines and fit.

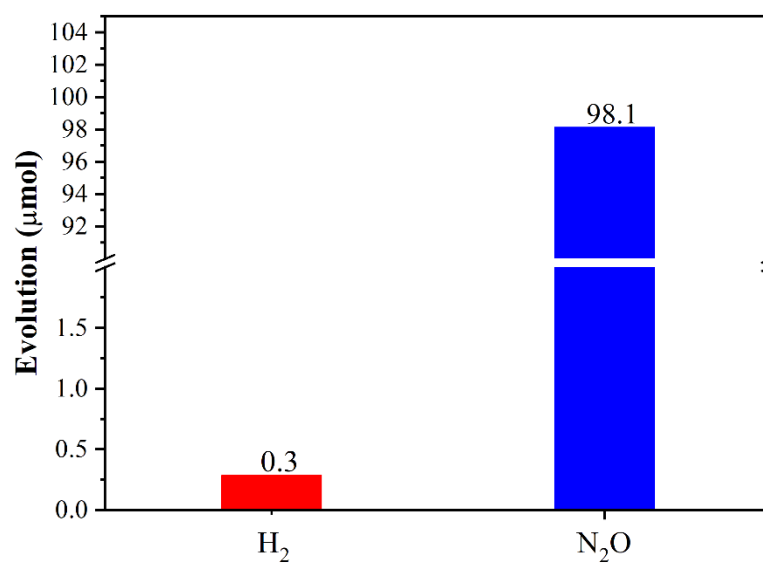

**Figure S3.** The production of H<sub>2</sub> and N<sub>2</sub>O with TiO<sub>2</sub> and light after 5 days illumination.

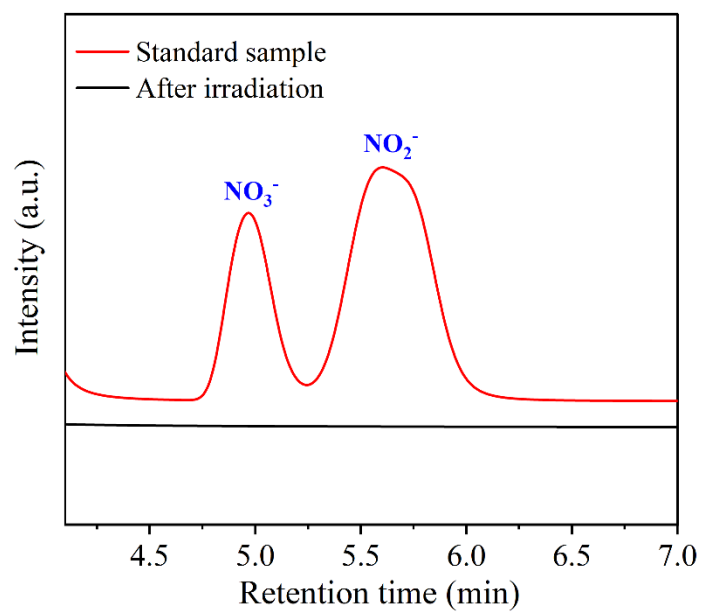

**Figure S4.** Comparison of the reaction liquid ion chromatogram after irradiation (black line) and standard ion chromatogram (red line) of NO<sub>3</sub><sup>-</sup> and NO<sub>2</sub><sup>-</sup>.

---

## Reference

1. Yang, H.G., C.H. Sun, S.Z. Qiao, J. Zou, G. Liu, S.C. Smith, H.M. Cheng, and G.Q. Lu Anatase TiO<sub>2</sub> single crystals with a large percentage of reactive facets. *Nature* **2008**, *453*, 638–641.
2. Wang, W.K., J.J. Chen, X. Zhang, Y.X. Huang, W.W. Li, and H.Q. Yu Self-induced synthesis of phase-junction TiO<sub>2</sub> with a tailored rutile to anatase ratio below phase transition temperature. *Scientific Reports* **2016**, *6*, 20491.
3. Yu, Y., W. Wen, X.Y. Qian, J.B. Liu, and J.M. Wu UV and visible light photocatalytic activity of Au/TiO<sub>2</sub> nanoforests with Anatase/Rutile phase junctions and controlled Au locations. *Scientific Reports* **2017**, *7*, 41253.
4. Batalovic, K., N. Bundaleski, J. Radakovic, N. Abazovic, M. Mitric, R.A. Silva, M. Savic, J. Belosevic-Cavor, Z. Rakocevic, and C.M. Rangel Modification of N-doped TiO<sub>2</sub> photocatalysts using noble metals (Pt, Pd) - a combined XPS and DFT study. *Phys. Chem. Chem. Phys.* **2017**, *19*, 7062–7071.
